# Supplementary material
Source: PubMed Central journal article supplement (PMC3639587)

**A**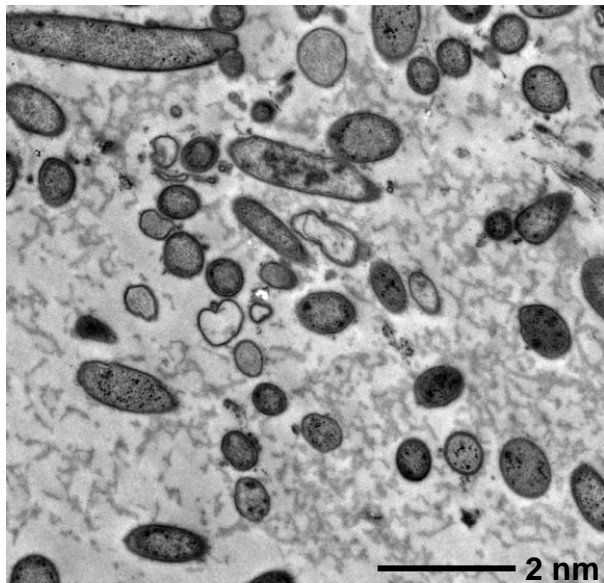**B**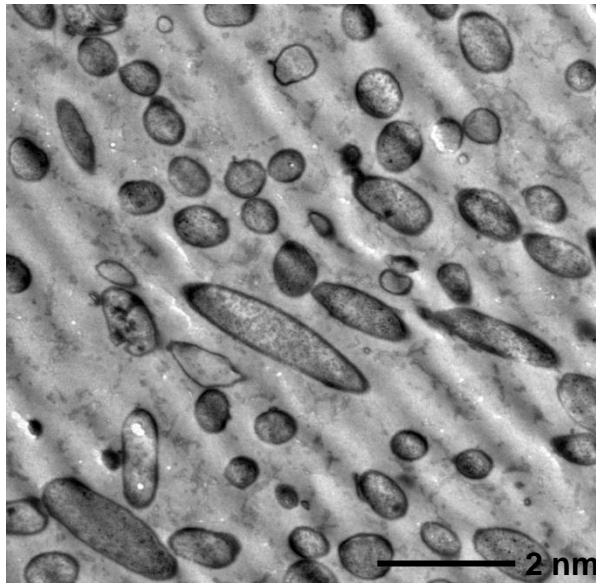**C**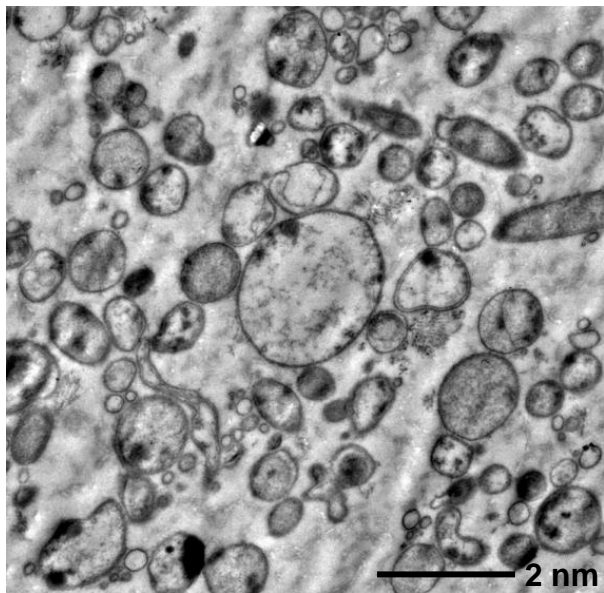**D**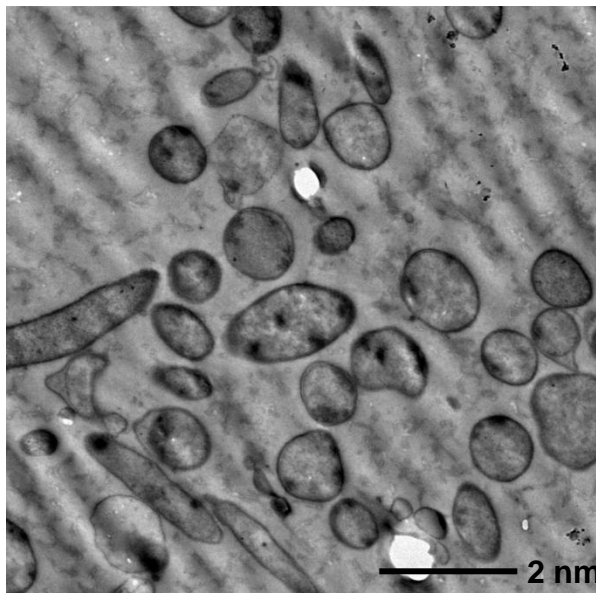**Supplemental FIG. 1**

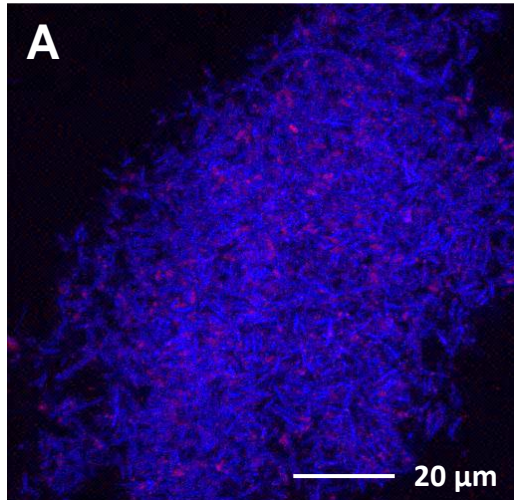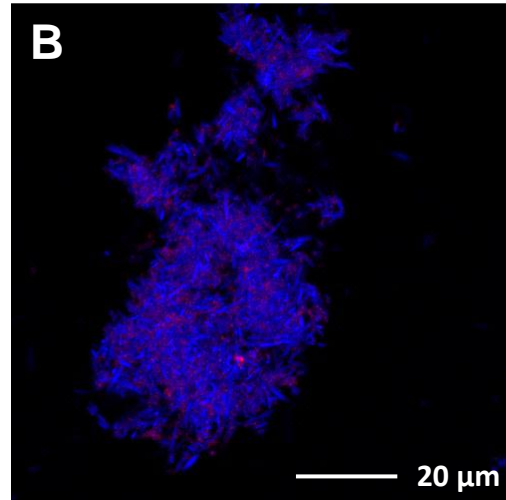

**Supplemental FIG. 2**

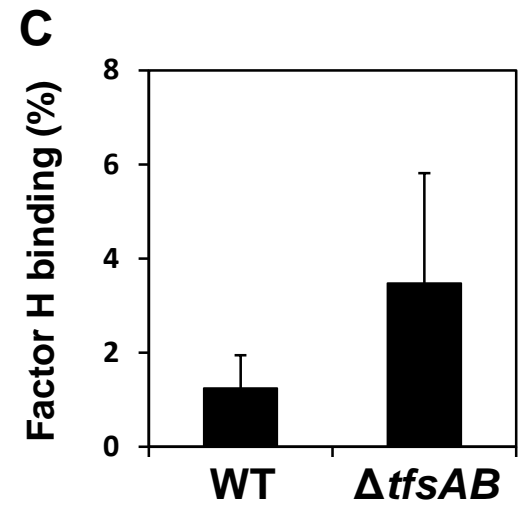

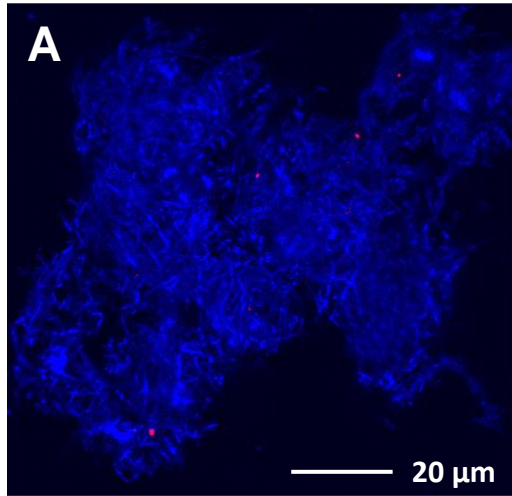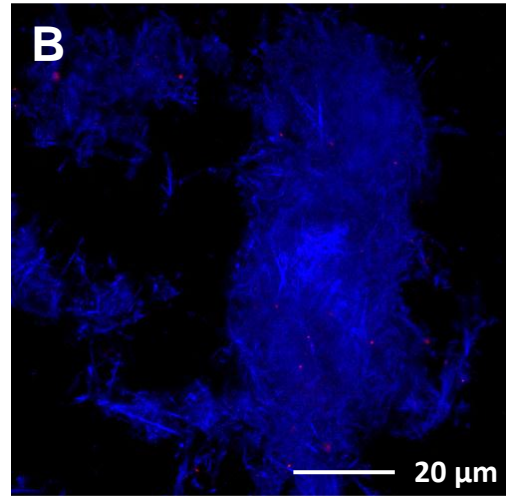

**Supplemental FIG. 3**

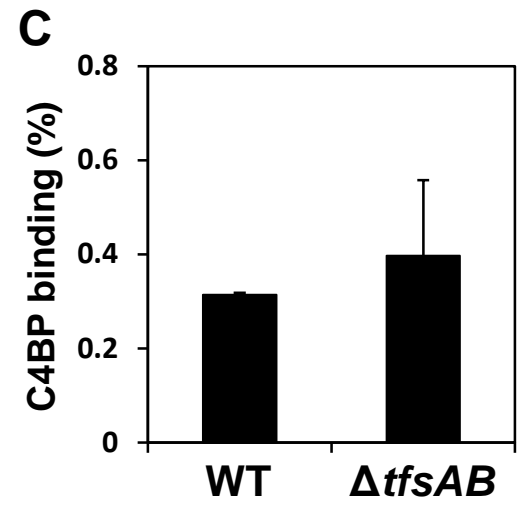

Supplement: IAI.00983-12_zii999090062so1.pdf [file IAI.00983-12_zii999090062so1.pdf]
